# Supplementary material for: Strains producing different short-chain fatty acids alleviate DSS-induced ulcerative colitis by regulating intestinal microecology
Source: Royal Society of Chemistry journal article supplement (doi:10.1039/d2fo01577c), 2022-01-01
Supplement: d2fo01577c1.pdf [file d2fo01577c1.pdf]

## Supplementary materials

**Table S1 Screening of high acetic acid producing strains.**

| Strains | acetic acid concentration (g/L) |
|---------|---------------------------------|
| H12-4   | 5.62                            |
| H9-2    | 5.59                            |
| H4-3    | 5.55                            |
| H4-2    | 5.11                            |
| H11     | 5.36                            |
| H10-1   | 5.30                            |
| H3-R1   | 1.39                            |
| H3-R2   | 6.38                            |

The strain was inoculated in De Man, Rogosa and Sharpe medium at  $1 \times 10^8$  CFU/ml, and the concentration of acetic acid in the fermentation broth was determined after 24h.

**Table S2 Screening of high propionic acid producing strains**

| Strains | Propionic acid concentration (g/L) |
|---------|------------------------------------|
| A1      | 3.06                               |
| A2      | 2.91                               |
| B1      | 7.38                               |
| B2      | 1.85                               |
| C1      | 2.74                               |
| C2      | 1.85                               |
| D1      | 2.97                               |
| D2      | 3.12                               |

The strain was inoculated in glucose medium at  $1 \times 10^8$  CFU/ml, and the concentration of propionic acid in the fermentation broth was determined after 120h.

**Table S3 Screening of high butyric acid producing strains**

| Strains | Butyric acid concentration (g/L) |
|---------|----------------------------------|
| C1-2    | 1.191                            |
| C1-6    | 2.156                            |
| C2-1    | 0.920                            |
| C2-3    | 1.573                            |
| C3-2    | 0.628                            |
| C6-1    | 1.042                            |

The strain was inoculated in reinforced clostridial medium at  $1 \times 10^8$  CFU/ml, and the concentration of butyric acid in the fermentation broth was determined after 24h.

**Table S4 Histological grading of colitis**

| Score | Inflammatory infiltrate | Extent of inflammation       | Crypt damage                                 |
|-------|-------------------------|------------------------------|----------------------------------------------|
| 0     | None                    | None                         | None                                         |
| 1     | Mild                    | Mucosa                       | 1/3 damaged                                  |
| 2     | Moderate                | Moderate Mucosa<br>submucosa | 2/3 damaged                                  |
| 3     | Severe                  | Transmural                   | Crypt loss but surface<br>epithelium present |
| 4     | —                       | —                            | Both crypt and surface<br>epithelium lost    |
